# Supplementary material
Source: HighWire-hosted journal article supplement (https://www.cmajopen.ca/highwire/filestream/85477/field_highwire_adjunct_files/1/2020-0207_Visual_abstract.pdf)
Supplement: 2020-0207_Visual_abstract.pdf [file 2020-0207_Visual_abstract.pdf]

# FRACTURE RISK ESTIMATION IN ALBERTA

## BONE MINERAL DENSITY REPORTS AND CLINICAL ASSESSMENTS DO NOT AGREE

### A VISUAL RESEARCH ABSTRACT

#### STUDY POPULATION

190 postmenopausal women who had a recent bone mineral density (BMD) scan and attended a consultation at an osteoporosis specialty clinic.

#### OBJECTIVE

To determine how frequently the fracture risk estimates on BMD reports (using CAROC) agree with risk estimates generated in a clinical encounter (using FRAX®).

#### 10Y FRACTURE RISK ESTIMATES

|                        | BMD Reports | Clinic Assessments |
|------------------------|-------------|--------------------|
| Low Risk (<10%)        | 14%         | 43%                |
| Moderate Risk (10-20%) | 68%         | 38%                |
| High Risk (≥20%)       | 18%         | 19%                |

#### DOCUMENTED FRACTURE HISTORY

|                           | BMD Reports | Clinic Assessments |
|---------------------------|-------------|--------------------|
| Prior fracture documented | 21%         | 31%                |

Percentage of patients placed in the same (**concordant**) or different (**discordant**) fracture risk categories by BMD reports and clinic assessments

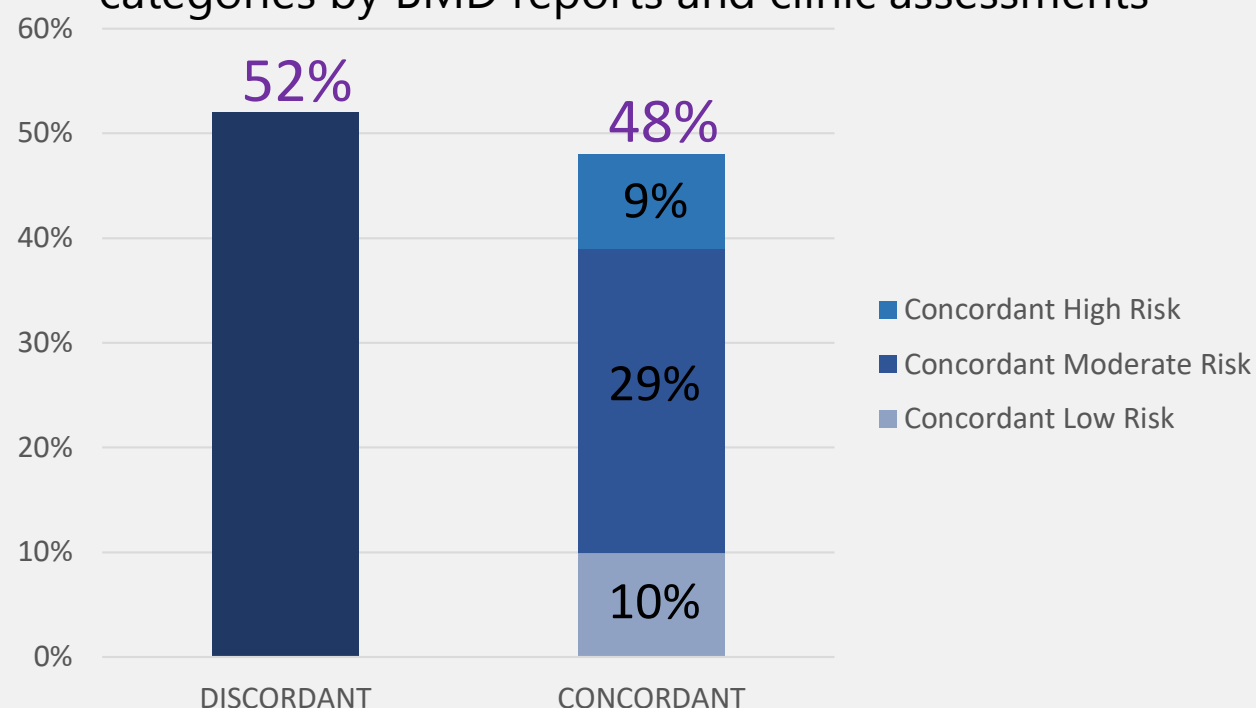

Risk estimates and fracture histories provided on bone mineral density reports frequently disagree with clinical assessments.  
A consistent and accurate fracture risk assessment process is required.
